# Supplementary material
Source: PubMed Central journal article supplement (PMC6235044)
Supplement: rspb20181954supp1.pdf [file rspb20181954supp1.pdf]

# Electronic Supplementary Material

## Supplementary Results

### Isogamete versus microgamete volume

For unicellular species, isogamete volume is generally higher than microgamete volume. We tested this pattern by regressing the  $\log_{10}$  volumes of isogametes and microgametes on  $\log_{10}$  protoplasmic volume and comparing the residuals between isogametes and microgametes (Fig. S3). One isogamous species, *Lobocharacium coloradoense*, has an exceptionally high protoplasmic volume because it is multinucleate, and therefore could be classified as colonial, and for this reason was omitted from the analysis. A one-tail  $t$ -test, assuming unequal variances, between the residuals of isogamete (mean  $\pm$  standard deviation) ( $0.2709 \pm 0.5236 \mu\text{m}^3$ ) and microgamete ( $-0.4741 \pm 0.2476 \mu\text{m}^3$ ) volumes shows that isogametes are significantly larger than microgametes for unicellular species ( $t = 4.5130$ ,  $df = 20$ ,  $P = 0.0001$ ). A similar pattern holds for colonial and multicellular species. Because microgamete volume is not linearly related to protoplasmic volume for these species,  $\log_{10}$  volumes were directly compared between isogametes ( $2.9120 \pm 0.4755 \mu\text{m}^3$ ) and microgametes ( $2.2220 \pm 0.7327 \mu\text{m}^3$ ), showing that isogametes are significantly larger ( $t = 3.0571$ ,  $df = 26$ ,  $P = 0.0026$ ). To control for the positive relationship between isogamete and microgamete volumes and protoplasmic volume for these species,  $\log_{10}$  isogamete and microgamete volumes were regressed on  $\log_{10}$  protoplasmic volume, and the residuals of isogamete volume were compared to the differences between microgamete volume and the gamete volume predicted from the regression for the species' protoplasmic volume (Fig. S4). This also shows that isogametes ( $-0.2912 \pm 0.4652 \mu\text{m}^3$ ) are significantly larger than microgametes ( $-1.7767 \pm 0.9215 \mu\text{m}^3$ ) for colonial and multicellular species ( $t = 5.6260$ ,  $df = 23$ ,  $P = 5.01 \times 10^{-6}$ ).

Table S1. Gamete chloroplast characteristics of isogamous volvocine algae.

| Family              | Species                             | No. of cells | Structural grade | Gamete chloroplast                                                                                                                                            | Ref.     |
|---------------------|-------------------------------------|--------------|------------------|---------------------------------------------------------------------------------------------------------------------------------------------------------------|----------|
| Characiosiphonaceae | <i>Lobocharacium coloradoense</i>   | 1            | unicellular      | Chloroplast with pyrenoid; Sparse amounts of starch in chloroplast; Chloroplast does not occupy significant area of gamete                                    | [1]      |
| Chlamydomonadaceae  | <i>Carteria palmata</i>             | 1            | unicellular      | Chloroplast containing a pyrenoid and an eyespot                                                                                                              | [2]      |
| Chlamydomonadaceae  | <i>Chlamydomonas chlamydogama</i>   | 1            | unicellular      | Chloroplast occupies most of cell; one prominent pyrenoid                                                                                                     | [3]      |
| Chlamydomonadaceae  | <i>Chlamydomonas microhalophila</i> | 1            | unicellular      | Chloroplast occupies large space; pyrenoid present                                                                                                            | [4]      |
| Chlamydomonadaceae  | <i>Chlamydomonas moewusii</i>       | 1            | unicellular      | Chloroplast present                                                                                                                                           | [5]      |
| Chlamydomonadaceae  | <i>Chlamydomonas reinhardtii</i>    | 1            | unicellular      | Chloroplast contains an abundance of starch; pyrenoid present                                                                                                 | [6, 7]   |
| Chlamydomonadaceae  | <i>Lobochlamys segnis</i>           | 1            | unicellular      | Dissected plastid with faintly visible pyrenoids                                                                                                              | [8]      |
| Chlamydomonadaceae  | <i>Pseudocarteria corcontica</i>    | 1            | unicellular      | Chloroplast with one pyrenoid                                                                                                                                 | [9]      |
| Chlorosarcinaceae   | <i>Desmotetra antarctica</i>        | 16           | colonial         | Chloroplast present                                                                                                                                           | [10]     |
| Chlorosarcinaceae   | <i>Desmotetra aureospora</i>        | 16           | colonial         | Small discoid chloroplast                                                                                                                                     | [10]     |
| Goniaceae           | <i>Gonium sociale</i>               | 4            | colonial         | Chloroplast with one pyrenoid                                                                                                                                 | [11]     |
| Goniaceae           | <i>Gonium quadratum</i>             | 16           | colonial         | Chloroplast with one pyrenoid                                                                                                                                 | [12]     |
| Goniaceae           | <i>Gonium viridistellatum</i>       | 16           | colonial         | Massive chloroplast with one pyrenoid                                                                                                                         | [13]     |
| Goniaceae           | <i>Gonium multicocum</i>            | 32           | colonial         | Massive chloroplast                                                                                                                                           | [14]     |
| Tetrabaenaceae      | <i>Basichlamys sacculifera</i>      | 4            | colonial         | Chloroplast with one pyrenoid                                                                                                                                 | [11]     |
| Volvocaceae         | <i>Volvolina compacta</i>           | 16           | colonial         | Massive chloroplast, up to 20µm dia. (cell ~21µm dia.) with a single large basal pyrenoid with many associated starch grains                                  | [15, 16] |
| Volvocaceae         | <i>Volvolina pringsheimii</i>       | 16           | colonial         | Massive chloroplast                                                                                                                                           | [17]     |
| Volvocaceae         | <i>Pandorina unicocca</i>           | 32           | colonial         | Massive chloroplast; Chloroplast fills most of posterior part of cell and periphery of anterior part of cell; pyrenoid is surrounded by several starch grains | [18, 19] |
| Volvocaceae         | <i>Volvolina steinii</i>            | 32           | colonial         | Chloroplast without pyrenoid                                                                                                                                  | [20]     |
| Volvocaceae         | <i>Astrephomene gubernaculifera</i> | 128          | multicellular    | Chloroplast present                                                                                                                                           | [20]     |

Table S2. Gamete chloroplast characteristics of anisogamous volvocine algae.

| Family             | Species                              | No. of cells | Structural grade | Gamete dimorphism* | Microgamete chloroplast                                           | Macrogamete chloroplast                                                                                  | Ref.     |
|--------------------|--------------------------------------|--------------|------------------|--------------------|-------------------------------------------------------------------|----------------------------------------------------------------------------------------------------------|----------|
| Chlamydomonadaceae | <i>Chlamydomonas allensworthii</i>   | 1            | unicellular      | anisogamy          | No information                                                    | Photosynthetic system deconstructed to produce chemoattractant; chloroplast fades from green to brownish | [21]     |
| Chlamydomonadaceae | <i>Chlamydomonas sphagnicola</i>     | 1            | unicellular      | oogamy             | Smaller than the macrogamete chloroplast; one pyrenoid            | Large compared to microgamete chloroplast; four pyrenoids                                                | [22]     |
| Chlamydomonadaceae | <i>Chlamydomonas suboogama</i>       | 1            | unicellular      | anisogamy          | Smaller than macrogamete chloroplast; no pyrenoid                 | Larger than microgamete chloroplast; covers large area of gamete; one large pyrenoid                     | [22]     |
| Chlamydomonadaceae | <i>Oogamochlamys ettliei</i>         | 1            | unicellular      | oogamy             | Chloroplast reduced and pale green; no pyrenoid                   | No information                                                                                           | [23]     |
| Chlamydomonadaceae | <i>Oogamochlamys gigantea</i>        | 1            | unicellular      | oogamy             | Chloroplast reduced and pale green or yellow-tinged; no pyrenoid; | Large in comparison to microgamete chloroplast; occupies most of cell; five pyrenoids                    | [22, 23] |
| Chlamydomonadaceae | <i>Oogamochlamys zimbabwiensis</i>   | 1            | unicellular      | oogamy             | Chloroplast reduced; pale green; no pyrenoid                      | No information                                                                                           | [23]     |
| Volvocaceae        | <i>Eudorina echidna</i>              | 16           | colonial         | anisogamy (I)      | Yellow-green chloroplast occupies lower half of cell              | Chloroplast with a pyrenoid                                                                              | [24]     |
| Volvocaceae        | <i>Colemanosphaera charkowiensis</i> | 32           | colonial         | anisogamy          | No information                                                    | Chloroplast with 3-8 pyrenoids                                                                           | [25]     |
| Volvocaceae        | <i>Eudorina cylindrica</i>           | 32           | colonial         | anisogamy (I)      | Yellow-green chloroplast occupies lower half of cell              | Chloroplast with one large central or basal pyrenoid and one to several smaller peripheral pyrenoids     | [24]     |
| Volvocaceae        | <i>Eudorina elegans</i>              | 32           | colonial         | anisogamy (I)      | Yellow-green chloroplast occupies lower half of cell              | Multiple pyrenoids in chloroplast                                                                        | [24, 26] |
| Volvocaceae        | <i>Eudorina illinoisensis</i>        | 32           | colonial         | anisogamy (I)      | Yellow-green chloroplast occupies lower half of cell              | Chloroplast with one to several pyrenoids                                                                | [24]     |
| Volvocaceae        | <i>Eudorina unicocca</i>             | 32           | colonial         | anisogamy (I)      | Yellow-green chloroplast occupies lower half of cell              | Chloroplast with one large central or basal pyrenoid                                                     | [24]     |

| Family      | Species                       | No. of cells | Structural grade | Gamete dimorphism* | Microgamete chloroplast                                     | Macrogamete chloroplast                                                                           | Ref. |
|-------------|-------------------------------|--------------|------------------|--------------------|-------------------------------------------------------------|---------------------------------------------------------------------------------------------------|------|
| Volvocaceae | <i>Pleodorina starrii</i>     | 64           | multicellular    | anisogamy (I)      | No information                                              | Massive chloroplast with basal pyrenoid surrounded by starch grains; fills most of cell periphery | [27] |
| Volvocaceae | <i>Pleodorina californica</i> | 128          | multicellular    | anisogamy (I)      | Yellow-green chloroplast occupies lower half of cell        | One to many pyrenoids present                                                                     | [24] |
| Volvocaceae | <i>Pleodorina japonica</i>    | 128          | multicellular    | anisogamy (I)      | No information                                              | Chloroplast with pyrenoids                                                                        | [28] |
| Volvocaceae | <i>Pleodorina sphaerica</i>   | 128          | multicellular    | anisogamy (I)      | No information                                              | Massive chloroplast with 4-10 pyrenoids                                                           | [29] |
| Volvocaceae | <i>Volvox tertius</i>         | 2,000        | multicellular    | oogamy (I)         | No chlorophyll in microgamete                               | No information                                                                                    | [30] |
| Volvocaceae | <i>Volvox carteri</i>         | 3,000        | multicellular    | oogamy (I)         | Large chloroplast contains zero to several condensed nuclei | Enlarged chloroplast with pyrenoids                                                               | [31] |
| Volvocaceae | <i>Volvox aureus</i>          | 3,200        | multicellular    | oogamy (I)         | No information                                              | Chloroplast with pyrenoids                                                                        | [30] |

\*(I) indicates internal fertilization.

Table S3. Protoplasm and gamete volumes for volvocine algae. Data are primarily from da Silva [32], with additional species from other sources [22, 29, 33-35].

| Family              | Species                             | No. of cells | Structural grade | Gamete dimorphism* | Protoplasm volume ( $\mu\text{m}^3$ ) | Macro- or iso-gamete volume ( $\mu\text{m}^3$ ), <i>b</i> | Micro- or iso-gamete volume ( $\mu\text{m}^3$ ), <i>a</i> | <i>b/a</i> |
|---------------------|-------------------------------------|--------------|------------------|--------------------|---------------------------------------|-----------------------------------------------------------|-----------------------------------------------------------|------------|
| Characiosiphonaceae | <i>Lobocharacium coloradoense</i>   | 1            | unicellular      | isogamy            | 1734159                               | 524                                                       | 524                                                       | 1          |
| Chlamydomonadaceae  | <i>Carteria eugametos</i>           | 1            | unicellular      | isogamy            | 785                                   | 785                                                       | 785                                                       | 1          |
| Chlamydomonadaceae  | <i>Carteria palmata</i>             | 1            | unicellular      | isogamy            | 5080                                  | 5080                                                      | 5080                                                      | 1          |
| Chlamydomonadaceae  | <i>Chlamydomonas acidophila</i>     | 1            | unicellular      | isogamy            | 1670                                  | 104                                                       | 104                                                       | 1          |
| Chlamydomonadaceae  | <i>Chlamydomonas allensworthii</i>  | 1            | unicellular      | anisogamy          | 950                                   | 950                                                       | 59                                                        | 16         |
| Chlamydomonadaceae  | <i>Chlamydomonas chlamydogama</i>   | 1            | unicellular      | isogamy            | 1120                                  | 560                                                       | 560                                                       | 1          |
| Chlamydomonadaceae  | <i>Chlamydomonas indica</i>         | 1            | unicellular      | isogamy            | 733                                   | 183                                                       | 183                                                       | 1          |
| Chlamydomonadaceae  | <i>Chlamydomonas iyengarii</i>      | 1            | unicellular      | isogamy            | 760                                   | 760                                                       | 760                                                       | 1          |
| Chlamydomonadaceae  | <i>Chlamydomonas microhalophila</i> | 1            | unicellular      | isogamy            | 1508                                  | 754                                                       | 754                                                       | 1          |
| Chlamydomonadaceae  | <i>Chlamydomonas moewusii</i>       | 1            | unicellular      | isogamy            | 8370                                  | 2093                                                      | 2093                                                      | 1          |
| Chlamydomonadaceae  | <i>Chlamydomonas pitschmannii</i>   | 1            | unicellular      | isogamy            | 873                                   | 55                                                        | 55                                                        | 1          |
| Chlamydomonadaceae  | <i>Chlamydomonas reinhardtii</i>    | 1            | unicellular      | isogamy            | 11000                                 | 5500                                                      | 5500                                                      | 1          |
| Chlamydomonadaceae  | <i>Chlamydomonas sphagnicola</i>    | 1            | unicellular      | oogamy             | 3591                                  | 3591                                                      | 225                                                       | 16         |
| Chlamydomonadaceae  | <i>Chlamydomonas suboogama</i>      | 1            | unicellular      | anisogamy          | 3054                                  | 3054                                                      | 191                                                       | 16         |
| Chlamydomonadaceae  | <i>Chloromonas chenangoensis</i>    | 1            | unicellular      | isogamy            | 4009                                  | 4009                                                      | 4009                                                      | 1          |
| Chlamydomonadaceae  | <i>Lobochlamys segnis</i>           | 1            | unicellular      | isogamy            | 700                                   | 22                                                        | 22                                                        | 1          |
| Chlamydomonadaceae  | <i>Microglena coccifera</i>         | 1            | unicellular      | oogamy             | 10306                                 | 10306                                                     | 644                                                       | 16         |
| Chlamydomonadaceae  | <i>Microglena monadina</i>          | 1            | unicellular      | anisogamy          | 6004                                  | 3002                                                      | 751                                                       | 4          |
| Chlamydomonadaceae  | <i>Oogamochlamys ettliei</i>        | 1            | unicellular      | oogamy             | 6842                                  | 6842                                                      | 428                                                       | 16         |
| Chlamydomonadaceae  | <i>Oogamochlamys gigantea</i>       | 1            | unicellular      | oogamy             | 8181                                  | 8181                                                      | 128                                                       | 64         |
| Chlamydomonadaceae  | <i>Oogamochlamys zimbabwiensis</i>  | 1            | unicellular      | oogamy             | 4189                                  | 4189                                                      | 262                                                       | 16         |
| Chlamydomonadaceae  | <i>Pseudocarteria corcontica</i>    | 1            | unicellular      | isogamy            | 13360                                 | 13360                                                     | 13360                                                     | 1          |
| Chlorosarcinaceae   | <i>Desmotetra antarctica</i>        | 16           | colonial         | isogamy            | 147244                                | 575                                                       | 575                                                       | 1          |

| Family            | Species                              | No. of cells | Structural grade | Gamete dimorphism* | Protoplasm volume ( $\mu\text{m}^3$ ) | Macro- or iso-gamete volume ( $\mu\text{m}^3$ ), <i>b</i> | Micro- or iso-gamete volume ( $\mu\text{m}^3$ ), <i>a</i> | <i>b/a</i> |
|-------------------|--------------------------------------|--------------|------------------|--------------------|---------------------------------------|-----------------------------------------------------------|-----------------------------------------------------------|------------|
| Chlorosarcinaceae | <i>Desmotetra aureospora</i>         | 16           | colonial         | isogamy            | 77584                                 | 303                                                       | 303                                                       | 1          |
| Goniaceae         | <i>Gonium maiaprilis</i>             | 16           | colonial         | isogamy            | 28272                                 | 221                                                       | 221                                                       | 1          |
| Goniaceae         | <i>Gonium pectorale</i>              | 16           | colonial         | isogamy            | 75600                                 | 2363                                                      | 2363                                                      | 1          |
| Goniaceae         | <i>Gonium quadratum</i>              | 16           | colonial         | isogamy            | 11200                                 | 697                                                       | 697                                                       | 1          |
| Goniaceae         | <i>Gonium viridistellatum</i>        | 16           | colonial         | isogamy            | 28300                                 | 884                                                       | 884                                                       | 1          |
| Goniaceae         | <i>Gonium multicocum</i>             | 32           | colonial         | isogamy            | 97700                                 | 3053                                                      | 3053                                                      | 1          |
| Goniaceae         | <i>Astrephomene gubernaculifera</i>  | 128          | multicellular    | isogamy            | 6100000                               | 3050                                                      | 3050                                                      | 1          |
| Haematococcaceae  | <i>Chlorogonium mariae</i>           | 1            | unicellular      | isogamy            | 524                                   | 131                                                       | 131                                                       | 1          |
| Haematococcaceae  | <i>Stephanosphaera pluvialis</i>     | 8            | colonial         | isogamy            | 10648                                 | 83                                                        | 83                                                        | 1          |
| Tetrabaenaceae    | <i>Tetrabaena socialis</i>           | 4            | colonial         | isogamy            | 11800                                 | 738                                                       | 738                                                       | 1          |
| Volvocaceae       | <i>Volvulina pringsheimii</i>        | 16           | colonial         | isogamy            | 28300                                 | 1767                                                      | 1767                                                      | 1          |
| Volvocaceae       | <i>Colemanosphaera charkowiensis</i> | 32           | colonial         | anisogamy          | 82318                                 | 2572                                                      | 80                                                        | 32         |
| Volvocaceae       | <i>Eudorina elegans</i>              | 32           | colonial         | anisogamy (I)      | 232000                                | 3625                                                      | 57                                                        | 64         |
| Volvocaceae       | <i>Pandorina morum</i>               | 32           | colonial         | isogamy            | 294000                                | 574                                                       | 574                                                       | 1          |
| Volvocaceae       | <i>Platydorina caudata</i>           | 32           | colonial         | anisogamy          | 262000                                | 4094                                                      | 128                                                       | 32         |
| Volvocaceae       | <i>Volvulina steinii</i>             | 32           | colonial         | isogamy            | 70600                                 | 2206                                                      | 2206                                                      | 1          |
| Volvocaceae       | <i>Pleodorina indica</i>             | 64           | multicellular    | anisogamy (I)      | 357000                                | 1150                                                      | 18                                                        | 64         |
| Volvocaceae       | <i>Pleodorina japonica</i>           | 128          | multicellular    | anisogamy (I)      | 1040000                               | 14100                                                     | 110                                                       | 128        |
| Volvocaceae       | <i>Pleodorina sphaerica</i>          | 128          | multicellular    | anisogamy (I)      | 406943                                | 14137                                                     | 110                                                       | 129        |
| Volvocaceae       | <i>Volvox pocockiae</i>              | 1500         | multicellular    | oogamy (I)         | 2650000                               | 113000                                                    | 1766                                                      | 64         |
| Volvocaceae       | <i>Volvox tertius</i>                | 2000         | multicellular    | oogamy (I)         | 763000                                | 655000                                                    | 20469                                                     | 32         |
| Volvocaceae       | <i>Volvox carteri</i>                | 3000         | multicellular    | oogamy (I)         | 1570000                               | 10300                                                     | 80                                                        | 128        |
| Volvocaceae       | <i>Volvox aureus</i>                 | 3200         | multicellular    | oogamy (I)         | 362000                                | 7230                                                      | 226                                                       | 32         |
| Volvocaceae       | <i>Volvox obversus</i>               | 4000         | multicellular    | oogamy (I)         | 2090000                               | 38800                                                     | 303                                                       | 128        |
| Volvocaceae       | <i>Volvox africanus</i>              | 6000         | multicellular    | oogamy (I)         | 963000                                | 47700                                                     | 373                                                       | 128        |

| Family      | Species                   | No. of cells | Structural grade | Gamete dimorphism* | Protoplasm volume ( $\mu\text{m}^3$ ) | Macro- or iso-gamete volume ( $\mu\text{m}^3$ ), <i>b</i> | Micro- or iso-gamete volume ( $\mu\text{m}^3$ ), <i>a</i> | <i>b/a</i> |
|-------------|---------------------------|--------------|------------------|--------------------|---------------------------------------|-----------------------------------------------------------|-----------------------------------------------------------|------------|
| Volvocaceae | <i>Volvox capensis</i>    | 20000        | multicellular    | oogamy (I)         | 42100000                              | 125000                                                    | 244                                                       | 512        |
| Volvocaceae | <i>Volvox globator</i>    | 22000        | multicellular    | oogamy (I)         | 737000                                | 11000                                                     | 43                                                        | 256        |
| Volvocaceae | <i>Volvox dissipatrix</i> | 31800        | multicellular    | oogamy (I)         | 133000000                             | 33500                                                     | 131                                                       | 256        |
| Volvocaceae | <i>Volvox rousseletii</i> | 50000        | multicellular    | oogamy (I)         | 105000000                             | 14100                                                     | 28                                                        | 512        |

\*(I) indicates internal fertilisation.

Table S4. Phylogenetically independent contrasts of the slope of log anisogamy ratio ( $b/a$ ) on log protoplasmic volume for anisogamous taxa.

| Contrast | Taxon 1                              | Log <sub>10</sub><br>Protoplasmic<br>volume ( $\mu\text{m}^3$ ) | Log <sub>10</sub><br>$b/a$ | Taxon 2                            | Log <sub>10</sub><br>Protoplasmic<br>volume ( $\mu\text{m}^3$ ) | Log <sub>10</sub><br>$b/a$ | Slope  |
|----------|--------------------------------------|-----------------------------------------------------------------|----------------------------|------------------------------------|-----------------------------------------------------------------|----------------------------|--------|
| 1        | <i>Volvox dissipatrix</i>            | 8.1239                                                          | 2.4082                     | <i>Volvox tertius</i>              | 5.8825                                                          | 1.5051                     | 0.4029 |
| 2        | mean of contrast 1                   | 7.8253                                                          | 2.1584                     | <i>Volvox africanus</i>            | 5.9836                                                          | 2.1072                     | 0.0278 |
| 3        | <i>Volvox obversus</i>               | 6.3201                                                          | 2.1072                     | <i>Volvox carteri</i>              | 6.1959                                                          | 2.1072                     | 0      |
| 4        | mean of contrast 2                   | 7.5305                                                          | 2.1335                     | mean of contrast 3                 | 6.2625                                                          | 2.1072                     | 0.4956 |
| 5        | <i>Pleodorina japonica</i>           | 6.0170                                                          | 2.1072                     | <i>Volvox aureus</i>               | 5.5587                                                          | 1.5051                     | 1.3136 |
| 6        | mean of contrast 5                   | 5.8457                                                          | 1.9031                     | mean of contrast 4                 | 7.2523                                                          | 2.1206                     | 0.1546 |
| 7        | <i>Pleodorina indica</i>             | 5.5527                                                          | 1.8062                     | mean of contrast 6                 | 6.9679                                                          | 2.0253                     | 0.1548 |
| 8        | <i>Volvox rousseletii</i>            | 8.0212                                                          | 2.7093                     | <i>Volvox globator</i>             | 5.8675                                                          | 2.4082                     | 0.1398 |
| 9        | <i>Colemanosphaera charkowiensis</i> | 4.9155                                                          | 1.5051                     | <i>Platydorina caudata</i>         | 5.4183                                                          | 1.5051                     | 0      |
| 10       | mean of contrast 8                   | 7.7232                                                          | 2.5843                     | mean of contrast 9                 | 5.2359                                                          | 1.5051                     | 0.4339 |
| 11       | mean of contrast 7                   | 6.6833                                                          | 1.9294                     | mean of contrast 10                | 7.4236                                                          | 2.3181                     | 0.5250 |
| 12       | <i>Oogamochlamys ettliei</i>         | 3.8352                                                          | 1.2041                     | <i>Oogamochlamys gigantea</i>      | 3.9128                                                          | 1.8062                     | 7.7577 |
| 13       | mean of contrast 12                  | 3.8757                                                          | 1.6021                     | <i>Oogamochlamys zimbabwiensis</i> | 3.6221                                                          | 1.2041                     | 1.5688 |



Table S5. Phylogenetically independent contrasts between isogamete and microgamete volumes. (See text for descriptions of contrasts.)

| Contrast                 | Mean residual log <sub>10</sub> gamete volume (μm <sup>3</sup> ) |             |
|--------------------------|------------------------------------------------------------------|-------------|
|                          | Isogamete                                                        | Microgamete |
| Unicellular              | 0.3055                                                           | -0.6278     |
| Colonial/multicellular 1 | -0.1520                                                          | -2.1551     |
| Colonial/multicellular 2 | -0.1049                                                          | -1.6486     |

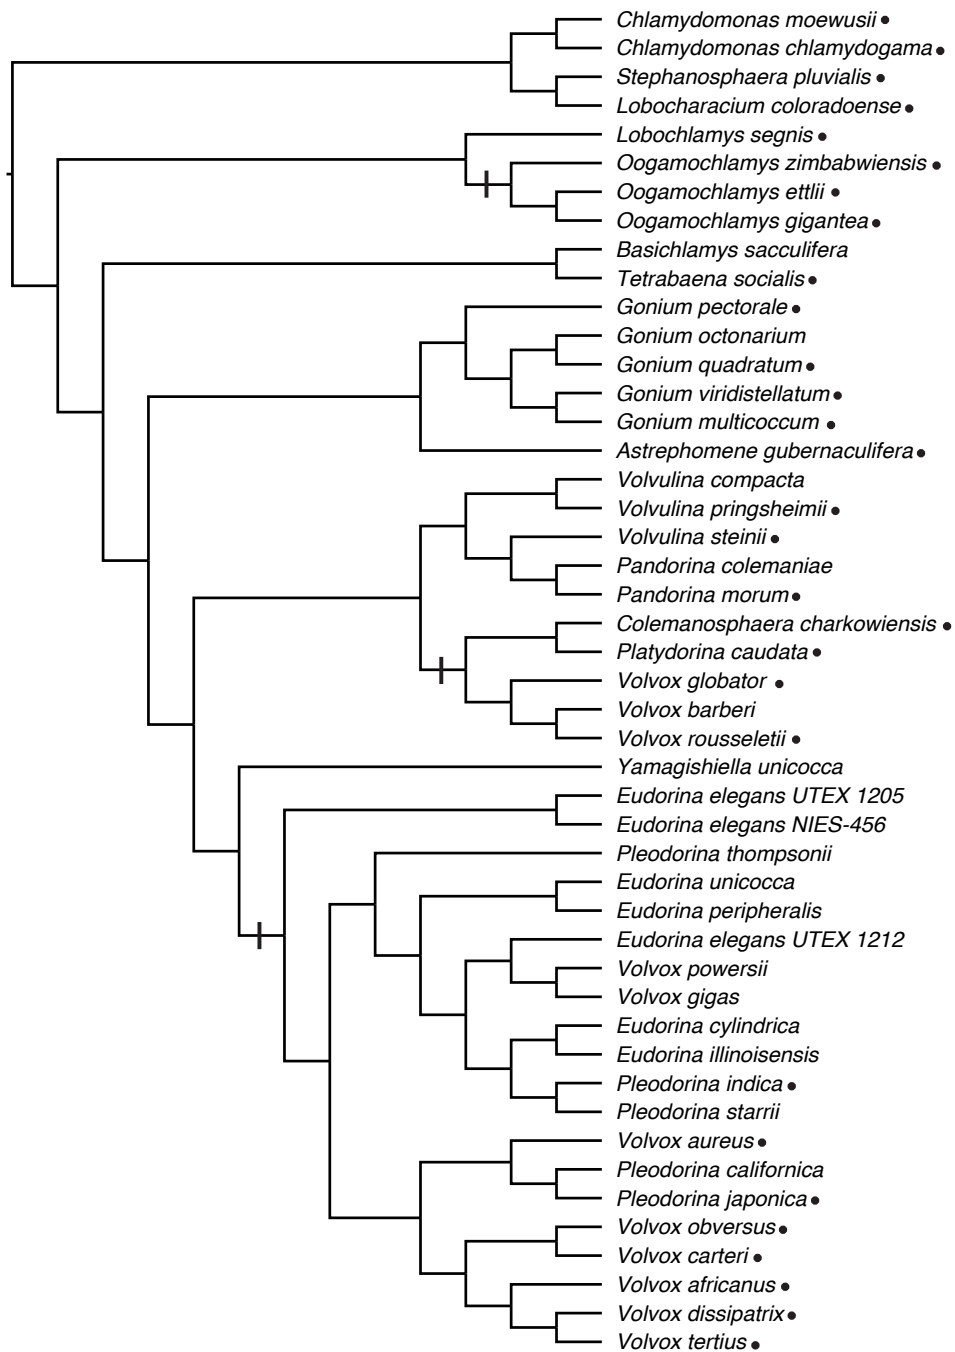

Figure S1. A composite phylogeny of the volvocine algae. Vertical black bars indicate origins of anisogamy (including oogamy). All taxa descending from these origins are anisogamous; all other taxa are isogamous. A dot following a taxon name indicates that gamete and adult volumes are available for the taxon. Details of this phylogeny are given in da Silva [32].

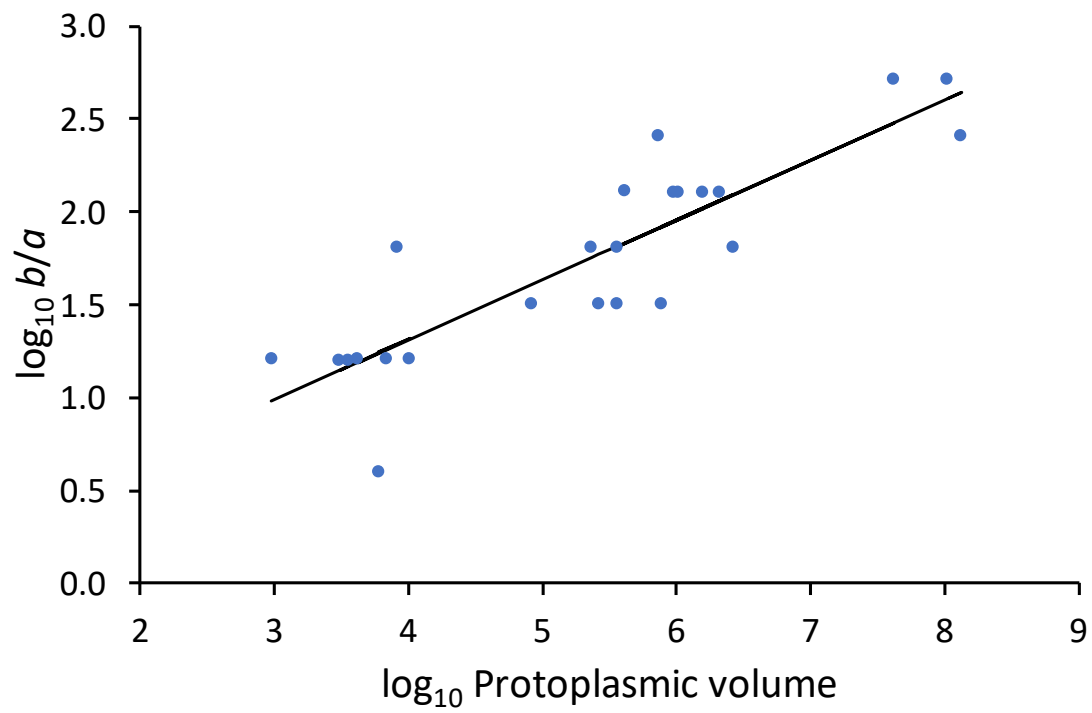

Figure S2. Anisogamy ratio ( $b/a$ ) regressed against protoplasmic volume for anisogamous species. Regression line:  $y = 0.0252 + 0.3220x$ ;  $r^2 = 0.75$ ;  $df = 22, 1$ ;  $F = 65.98$ ;  $P = 4.58 \times 10^{-8}$ .

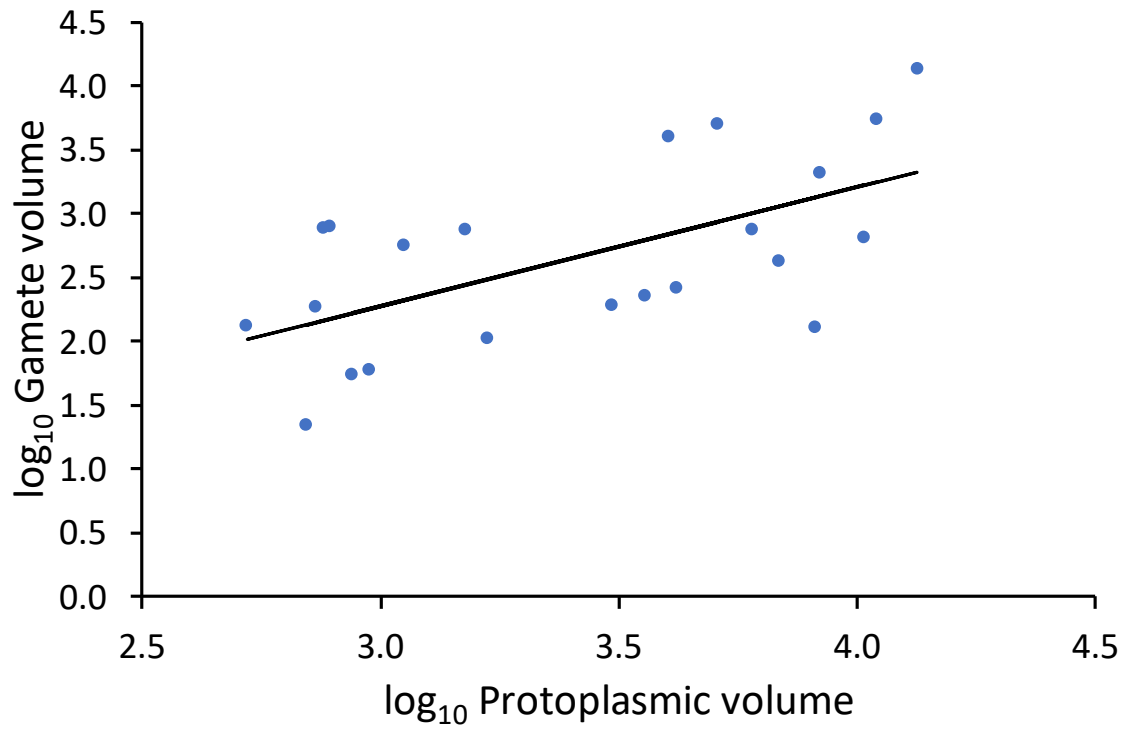

Figure S3. Isogamete and microgamete volumes regressed against protoplasmic volume for unicellular species. Regression line:  $y = -0.5280 + 0.9343x$ ;  $r^2 = 0.37$ ;  $df = 1, 20$ ;  $F = 11.69$ ;  $P = 0.0027$ .

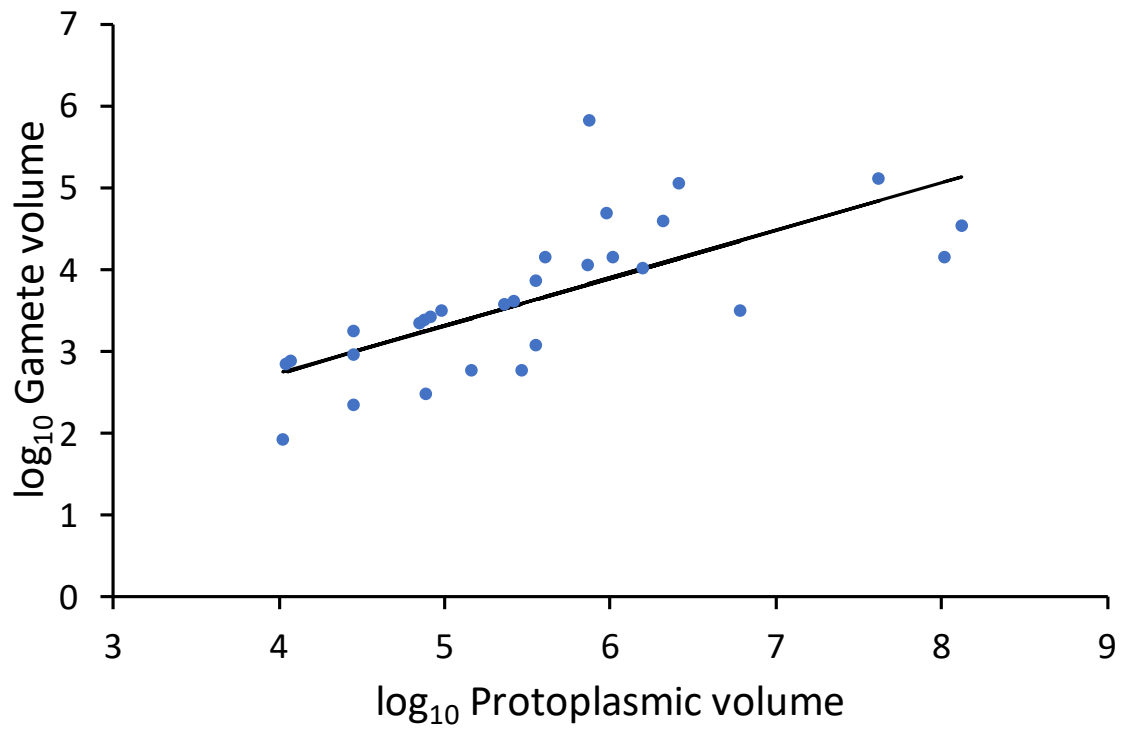

Figure S4. Isogamete and macrogamete volumes regressed against protoplasmic volume for colonial and multicellular species. Regression line:  $y = 0.4098 + 0.5807x$ ;  $r^2 = 0.50$ ;  $df = 1, 27$ ;  $F = 26.84$ ;  $P = 1.87 \times 10^{-5}$ .

## References

1. Kugrens P., Clay B.L., Aguiar R. 2000 Ultrastructure of *Lobocharacium coloradoense*, gen. et sp. nov. (Chlorophyta, Characiosiphonaceae), an unusual coenocyte from Colorado. *Journal of Phycology* **36**(2), 421-432. (doi:10.1046/j.1529-8817.2000.99089.x).
2. Suda S., Nozaki H., Watanabe M.M. 2005 Morphology and sexual reproduction of *Carteria palmata* sp. nov. belonging to the Carteria group I sensu Lembi (Chlorophyceae, Volvocales). *Phycologia* **44**(6), 596-607. (doi:Doi 10.2216/0031-8884(2005)44[596:Masroc]2.0.Co;2).
3. Bold H.C. 1949 The morphology of *Chlamydomonas chlamydogama*, sp. nov. *Bulletin of the Torrey Botanical Club* **76**(2), 101-108. (doi:10.2307/2482218).
4. Bischoff H.W. 1959 Some observations on *Chlamydomonas microhalophila* sp. nov. *Biological Bulletin* **117**(1), 54-62. (doi:10.2307/1539037).
5. Triemer R.E., Brown R.M. 1975 The ultrastructure of fertilization in *Chlamydomonas moewusii*. *Protoplasma* **84**(3), 315-325. (doi:10.1007/bf01279360).
6. Ende H.V.D. 1985 Sexual agglutination in chlamydomonads. In *Advances in Microbial Physiology* (eds. Rose A.H., Tempest D.W.), pp. 89-123, Academic Press.
7. Martin N.C., Goodenough U.W. 1975 Gametic differentiation in *Chlamydomonas reinhardtii* I. Production of gametes and their fine-structure. *J Cell Biol* **67**(3), 587-605. (doi:DOI 10.1083/jcb.67.3.587).
8. Deason T.R. 1967 *Chlamydomonas gymnogama*, a new homothallic species with naked gametes. *Journal of Phycology* **3**(2), 109-112. (doi:10.1111/j.1529-8817.1967.tb04642.x).
9. Nováková S. 2005 *Pseudocarteria corcontica*, a new quadriflagellate species (Volvocales). *Preslia* **77**(4), 453-457.
10. Ling H.U. 2001 Snow algae of the Windmill Islands, continental Antarctica: *Desmotetra aureospora*, sp. nov. and *D. antarctica*, comb. nov. (Chlorophyta). *Journal of Phycology* **37**(1), 160-174. (doi:10.1046/j.1529-8817.2001.037001160.x).
11. Stein J.R. 1959 The four-celled species of *Gonium*. *American journal of botany*, 366-371.
12. Nozaki H. 1993 Asexual and sexual reproduction in *Gonium quadratum* (chlorophyta) with a discussion of phylogenetic relationship within the Goniaceae. *Journal of Phycology* **29**(3), 369-376. (doi:10.1111/j.0022-3646.1993.00369.x).
13. Nozaki H. 1989 Morphological variation and reproduction in *Gonium viridistellatum* (Volvocales, Chlorophyta). *Phycologia* **28**(1), 77-88. (doi:doi:10.2216/i0031-8884-28-1-77.1).
14. Nozaki H., Kuroiwa T. 1991 Morphology and sexual reproduction of *Gonium multicoccum* (Volvocales, Chlorophyta) from Nepal. *Phycologia* **30**(5), 381-393. (doi:doi:10.2216/i0031-8884-30-5-381.1).
15. Nakada T., Tomita M., Nozaki H. 2010 *Volvulina compacta* (Volvocaceae, Chlorophyceae), new to Japan, and its phylogenetic position. *Journal of Japanese Botany* **85**(6), 364-369.
16. Nozaki H., Kuroiwa T. 1990 *Volvulina compacta* sp. nov. (Volvocaceae, Chlorophyta) from Nepal. *Phycologia* **29**(4), 410-417. (doi:10.2216/i0031-8884-29-4-410.1).
17. Starr R.C. 1962 A new species of *Volvulina* Playfair. *Archiv für Mikrobiologie* **42**(2), 130-137. (doi:10.1007/bf00408169).

18. Nozaki H., Kuroiwa T. 1992 Ultrastructure of the extracellular matrix and taxonomy of *Eudorina*, *Pleodorina* and *Yamagishiella* gen. nov. (Volvocaceae, Chlorophyta). *Phycologia* **31**(6), 529-541. (doi:doi:10.2216/i0031-8884-31-6-529.1).
19. Rayburn W.R., Starr R.C. 1974 Morphology and nutrition of *Pandorina unicocca* sp. nov. *Journal of Phycology* **10**(1), 42-49. (doi:10.1111/j.1529-8817.1974.tb02676.x).
20. Stein J.R. 1958 A morphological study of *Astrephomene gubernaculifera* and *Volvulina steinii*. *American journal of botany* **45**(5), 388-397. (doi:10.2307/2439639).
21. Jaenicke L., Starr R.C. 1996 The lurlenes, a new class of plastoquinone-related mating pheromones from *Chlamydomonas allensworthii* (Chlorophyceae). *European Journal of Biochemistry* **241**(2), 581-585.
22. Demchenko E., Mikhailiuk T. 2012 Peculiarities of sexual reproduction of some new for the flora of Ukraine and rare species of Volvocales (Chlorophyta). *International Journal on Algae* **14**(2), 120-135.
23. Pröschold T., Marin B., Schlösser U.G., Melkonian M. 2001 Molecular phylogeny and taxonomic revision of *Chlamydomonas* (Chlorophyta). I. Emendation of *Chlamydomonas ehrenberg* and *Chloromonas gobi*, and description of *Oogamochlamys* gen. nov. and *Lobochlamys* gen. nov. *Protist* **152**(4), 265-300. (doi:<http://dx.doi.org/10.1078/1434-4610-00068>).
24. Goldstein M. 1964 Speciation and mating behavior in *Eudorina*. *The Journal of Protozoology* **11**(3), 317-344. (doi:10.1111/j.1550-7408.1964.tb01762.x).
25. Nozaki H., Yamada T., Takahashi F., Matsuzaki R., Nakada T. 2014 New "missing link" genus of the colonial volvocine green algae gives insights into the evolution of oogamy. *BMC Evolutionary Biology* **14**(1), 37.
26. Iyengar M.O.P. 1933 Contributions to our knowledge of the colonial Volvocales of South India. *Journal of the Linnean Society of London, Botany* **49**(329), 323-373. (doi:10.1111/j.1095-8339.1933.tb00391.x).
27. Nozaki H., Ott F.D., Coleman A.W. 2006 Morphology, molecular phylogeny and taxonomy of two new species of *Pleodorina* (Volvoceae, Chlorophyceae). *Journal of Phycology* **42**(5), 1072-1080. (doi:10.1111/j.1529-8817.2006.00255.x).
28. Nozaki H., Kuroiwa H., Mita T., Kuroiwa T. 1989 *Pleodorina japonica* sp. nov. (Volvocales, Chlorophyta) with bacteria-like endosymbionts. *Phycologia* **28**(2), 252-267. (doi:doi:10.2216/i0031-8884-28-2-252.1).
29. Nozaki H., Mahakham W., Athibai S., Yamamoto K., Takusagawa M., Misumi O., Herron M.D., Rosenzweig F., Kawachi M. 2017 Rediscovery of the species of 'ancestral *Volvox*': morphology and phylogenetic position of *Pleodorina sphaerica* (Volvocales, Chlorophyceae) from Thailand. *Phycologia* **56**(4), 469-475. (doi:10.2216/17-3.1).
30. Pringsheim E.G. 1970 Identification and cultivation of European *Volvox* spp. *Anton Van Lee J M S* **36**(1), 33-43. (doi:Doi 10.1007/Bf02069005).
31. Kuroiwa H., Nozaki H., Kuroiwa T. 1993 Preferential digestion of chloroplast nuclei in sperms before and during fertilization in *Volvox carteri*. *Cytologia* **58**(3), 281-291. (doi:10.1508/cytologia.58.281).
32. da Silva J. 2018 The evolution of sexes: A specific test of the disruptive selection theory. *Ecology and Evolution* **8**(1), 207-219. (doi:10.1002/ece3.3656).
33. Rosowski J.R., Hoshaw R.W. 1988 Advanced anisogamy in *Chlamydomonas monadina* (Chlorophyceae) with special reference to vacuolar activity during sexuality. *Phycologia* **27**(4), 494-504. (doi:10.2216/i0031-8884-27-4-494.1).

34. Pollio A., Cennamo P., Ciniglia C., De Stefano M., Pinto G., A.R. Huss V. 2005 *Chlamydomonas pitschmannii* Ettl, a little known species from thermoacidic environments. *Protist* **156**(3), 287-302. (doi:<https://doi.org/10.1016/j.protis.2005.04.004>).
35. Mitra A.K. 1950 A peculiar method of sexual reproduction in certain new members of the Chlamydomonadaceae. *Hydrobiologia* **2**(3), 209-216. (doi:10.1007/BF00046556).
